# Supplementary material for: Cost–effectiveness analysis of prolonged-release fampridine to treat walking disability of multiple sclerosis in China
Source: Atypon-hosted journal article supplement (doi:10.2217/cer-2022-0109), 2022-07-27
Supplement: supplementary materials (6).docx [file supplementary%20materials%20(6).docx]

**[Supplementary Material 1]**

**Health Economic Study of Fampridine for the Treatment of Walking Disability in** **Multiple Sclerosis Patients in China**

***Discussion Guides prepared for the interview with***

***Multiple Sclerosis Related Clinical KOL***

***July 2021***

**Experts’ information**

| **Interview date** |  |
| --- | --- |
| **City** |  |
| **Hospital** |  |
| **Hospital level** |  |
| **Department** |  |
| **Title** |  |

1. **Symptomatic medications and** **duration of treatment in** **multiple sclerosis (MS) adult patients with walking disability (EDSS [expanded disability status scale] score 4-7)**

In addition to DMT (disease-modifying therapy), what medications may be used to treat MS adult patients with walking disability (EDSS score 4-7)? Based on your clinical practice, how long is the treatment duration of each medication?

| **Medication** | **Use or not？** | **Proportion of patients used (%)** | **Average duration of treatment per year (months)** |
| --- | --- | --- | --- |
| **Medications for cramp** |  |  |  |
| Carbamazepine |  | **%** |  |
| Oxcarbazepine |  | **%** |  |
| Tizanidine |  | **%** |  |
| Gabapentin |  | **%** |  |
| Baclofen |  | **%** |  |
| Botulinum toxin |  | **%** |  |
| Eperisone hydrochloride |  | **%** |  |
| **Medications for chronic pain** |  |  |  |
| Amitriptyline |  | **%** |  |
| Pregabalin |  | **%** |  |
| Tramadol |  | **%** |  |
| Oxycodone & Acetaminophen |  | **%** |  |
| **Antidepressants and anti-anxiety medications** |  |  |  |
| SSRI, SNRI, NaSSA, etc. |  | **%** |  |
| **Anticonvulsants** |  |  |  |
| Clonazepam |  | **%** |  |
| Benzhexol |  | **%** |  |
| Arotinolol |  | **%** |  |
| **Anti-fatigue medications** |  |  |  |
| Amantadine |  | **%** |  |
| Modafinil |  | **%** |  |
| **Other medication** |  |  |  |

Abbreviation: DOT, duration of therapy; SSRI, selective serotonin reuptake inhibitor; SNRI, serotonin and norepinephrine reuptake inhibitor; NaSSA, Noradrenergic and specific serotonergic antidepressant.

1. **Frequency and duration of rehabilitation therapy in** **MS adult patients with walking disability (EDSS score 4-7)**

Whether MS patients with walking disability (EDSS score 4-7) will be treated with rehabilitation in addition to medications? What are the frequency and treatment duration of the following rehabilitation programs?

| **Rehabilitation program (Beijing)** | **Is it included?** | **Frequency (times per month)** | **Duration of treatment (months)** |
| --- | --- | --- | --- |
| Comprehensive training for standing and walking ability |  |  |  |
| Lower extremity comprehensive exercise training |  |  |  |
| Occupational therapy for physical dysfunction |  |  |  |
| Occupational therapy assistive technology |  |  |  |
| Balance biofeedback training |  |  |  |

| **Rehabilitation program (Shanghai)** | **Is it included?** | **Frequency (times per month)** | **Duration of treatment (months)** |
| --- | --- | --- | --- |
| Comprehensive training of paraplegic limbs |  |  |  |
| Balance training |  |  |  |
| Large joint mobilization |  |  |  |
| Small joint mobilization |  |  |  |
| Electric stand-up training |  |  |  |
| Occupational therapy |  |  |  |
| Electrical stimulation |  |  |  |
| Hyperbaric oxygen therapy |  |  |  |
| Acupuncture |  |  |  |

1. **Healthcare resource utilization in the treatment of MS adult patients with walking disability (EDSS score 4-7)**
2. Please estimate the utilization frequency of healthcare resource for MS patients with walking disability who are currently under best supportive care (BSC) in China.

| **Healthcare utilization resource** | | **Frequency or duration** |
| --- | --- | --- |
| Neurology outpatient visits (times per year) | |  |
| Ophthalmology outpatient visits (times per year) | |  |
| Psychiatry outpatient visits (times per year) | |  |
| Urology outpatient visits (times per year) | |  |
| Gastroenterology outpatient visits (times per year) | |  |
| Outpatient visits in other departments (times per year) | |  |
| Emergency room visit (times per year) | |  |
| Hospitalization (times per year) | |  |
| Length of stay（days per time） | |  |
| Examination and lab tests | Magnetic resonance imaging (MRI) - brain |  |
| MRI - spinal cord |  |
| Lumbar puncture |  |
| CT scanning |  |
| Routine blood test |  |
| Routine urine test |  |
| Routine fecal test |  |
| Liver function tests |  |
| Kidney function tests |  |
| Electroencephalogram (EEG) |  |
| Electrocardiograph (ECG) |  |
| Echocardiography |  |
| Hepatobiliary ultrasound |  |
| Visual evoked potential test |  |
| Somatosensory evoked potential test |  |
| Motor evoked potential test |  |
| Ophthalmic optical coherence tomography |  |
| Fundus photography |  |
| Kinetic perimetry |  |
| Other: |  |

1. Please estimate the utilization and costs of assistive devices in MS patients with walking disability (EDSS score 4-7) under BSC

| **Assistive device** | **Is it needed?** | **The proportion of usage** | **Cost** |
| --- | --- | --- | --- |
| Manual wheelchair |  | % |  |
| Electric wheelchair |  | % |  |
| Crutch |  | % |  |
| Walker |  | % |  |
| Other |  | % |  |

1. **The relationship between walking ability and costs**
2. Based on your clinical practice, are there any differences in the frequency or cost of the outpatient, emergency, and inpatient visits for MS patients with different walking speeds? The walking speeds were measured by T25FW (Timed 25-Foot Walk). A study conducted in European countries showed the relationship between various types of costs at various walking speeds (Table below). Do you think the results correspond to the actual situation in China? If not, how do you think the relationship between the following healthcare resources and walking speed?

| **T25FW (Timed 25-Foot Walk)** | **Neurology outpatients** | **Rehabilitation** | **Emergency** | **Hospitalization** | **Outpatients in other departments**  **(Ophthalmology, psychiatry, urology,** **gastroenterology, etc.)** |
| --- | --- | --- | --- | --- | --- |
| 10-12s | 100% | 93% | 101% | 100% | 98% |
| **12s (baseline)*** | **100%** | **100%** | **100%** | **100%** | **100%** |
| 12-15s | 100% | 115% | 99% | 100% | 105% |
| 16-20s | 99% | 129% | 98% | 100% | 109% |
| 21-30s | 99% | 146% | 97% | 100% | 114% |
| 31-60s | 99% | 165% | 96% | 100% | 121% |
| >60s | 99% | 187% | 95% | 100% | 128% |

*Note: Taking the walking speed of the patients at the time of enrolment in the clinical trial as the baseline (12s).

1. Same as above, are there any differences in the use of assistive devices, loss of work, and nursing care costs for MS patients with different walking speeds? Are the results base on the study conducted in European countries in line with the actual situation in China? If not, how do you think the relationship between the following costs and walking speed?

| **T25FW (Timed 25-Foot Walk)** | **Assistive devices (Wheelchair, crutches, etc.)** | **Loss of work** | **Care costs** | **Environmental renovation (home and work environment renovation; transportation renovation)** |
| --- | --- | --- | --- | --- |
| 10-12s | 95% | 98% | 91% | 96% |
| **12s (baseline)*** | **100%** | **100%** | **100%** | **100%** |
| 12-15s | 110% | 104% | 119% | 108% |
| 16-20s | 117% | 106% | 136% | 114% |
| 21-30s | 126% | 109% | 153% | 120% |
| 31-60s | 134% | 112% | 172% | 127% |
| >60s | 143% | 116% | 190% | 135% |

*Note: Taking the walking speed of the patients at the time of enrolment in the clinical trial as the baseline (12s).

**—— This is the end of the interview, thank you for your time —**

**Supplementary Table 1** EQ-5D-5L utilities from the ENHANCE and MOBILE trial

| Time point | ENHANCE trial | | MOBILE trial | |
| --- | --- | --- | --- | --- |
| PR-fampridine responders | PR-fampridine non-responders and the BSC group | PR-fampridine responders | PR-fampridine non-responders and the BSC group |
| Baseline | 0.635 | 0.605 | 0.628 | 0.578 |
| Week 2 | 0.673 | 0.649 | 0.628 | 0.578 |
| Week 4 | 0.689 | 0.626 | 0.684 | 0.597 |
| Week 8 | 0.689 | 0.626 | 0.697 | 0.578 |
| Week 12 | 0.689 | 0.626 | 0.711 | 0.565 |
| Week 16 | 0.689 | 0.626 | 0.711 | 0.552 |
| Week 20 | 0.689 | 0.626 | 0.698 | 0.571 |
| Week 24+ | 0.677 | 0.634 | 0.706 | 0.530 |
| Abbreviations: BSC, best supportive care | | | | |
